# Supplementary material for: “If You Know the Enemy and Know Yourself”: Addressing the Problem of Biological Invasions in Ports Through a New NIS Invasion Threat Score, Routine Monitoring, and Preventive Action Plans
Source: Frontiers journal article supplement (doi:10.3389/fmars.2021.633118), 2021-03-18
Supplement: Data_Sheet_2.xlsx [file Data_Sheet_2.xlsx]

## Sheet: Supplementary table 1
	Supplementary table 1. Relationship between the EICAT impact categories and the invasion history score.
	EICAT Impact category	Impact	Theoretical invasion history score	Final invasion history score
	Massive	Irreversible community changes and extinctions	1	1
	Major	Community changes, which are reversible	0.8
	Moderate	Changes to populations, but not to community composition	0.6
	Minor	Fitness of individuals reduced, but no impact on populations	0.4
	Minimal Concern	Discernible impacts, but no effects on individual fitness of native species	0.2	0.2
	No Alien Populations	-	0	0

## Sheet: Supplementary table 2
	Supplementary table 2. Main biogeographic areas with maritime traffic arriving to the port of Gijon.
	Origin of ships	FAO Fishing Area	Main vessel origin	Marine traffic arriving to the port of Gijon (KGT)	Traffic ratio
	South West Atlantic	41	Brazil, Colombia	223170	0.41
	North East Atlantic	27	Russia, Latvia, Finland	97335	0.18
	Southern Pacific	81/71	Australia and New Zealand	85975	0.15
	North West Atlantic	31/21	Canada and USA	85808	0.15
	South East Atlantic	34/47	South Africa	34995	0.06
	Mediterranean	37	Ukraine	14865	0.03
	Northern Pacific	61	Canada	7138	0.02
	TOTAL			549286	1.00

## Sheet: Supplementary table 3
	Supplementary table 3. Non indigenous species with evidences of using maritime traffic as a spreading vector and with potential to arrive/establish in the port of Gijon (Bay of Biscay) and estimation of the invasion threat score (NIS-ITS). The NIS-ITS of each non indigenous species has been calculated by combining the habitat suitability, the invasion history and the maritime traffic scores. Spec…
		EVIDENCES OF USING MARITIME TRAFFIC AS A VECTOR				ESTIMATION OF THE INVASION THREAT SCORE FOR THE PORT OF GIJON						OBSERVED SCENARIO IN GIJON
	Species	Origin of the vessel	Arrived zone	Transported by	Reference	Habitat suitability score	Invasion history score			Total maritime traffic score	Total NIS-ITS	Reference for the species report
								Native traffic ratio	Invaded traffic ratio
1	Bugula neritina*	Coos Bay	Humboldt Bay	Hull fouling	Carlton & Hodder, 1995	1	1	0.013	0.987	1000	3000	This study
2	Ficopomatus enigmaticus	India	Australia	Hull fouling	Allen, 1953	1	1	0	1000	1000	3000	Miralles et al., 2016
3	Botryllus schlosseri*	-	Singapore	Hull fouling/Ballast Water	Lim et al. 2017	1	1	0	1000	1000	3000	Nydam et al., 2017
4	Diplosoma listerianum	Recreational Boating	Quebec	Hull fouling	Ma et al., 2019	1	1	0.936	0.063	0.999	2999	This study
5	Polydora cornuta	-	Singapore	Hull fouling/Ballast Water	Lim et al. 2017	1	1	0	0.936	0.936	2936	Not Found
6	Diadumene lineata	-	Port of Recife (Brazil)	Hull Fouling	Farrapeira et al., 2007	1	1	0	0.936	0.936	2936	Altuna, 2015
7	Acartia tonsa	North Adriatic Sea	Venice (Italy)	Ballast Water (Container ship)	Cabrini et al., 2018	1	1	0.562	0.267	0.829	2829	Aravena et al., 2009
8	Schizoporella errata	-	Hawaii	Hull fouling	Eldredge & Smith, 2001	1	1	0.090	0.731	0.821	2821	Not Found
9	Styela plicata*	-	Singapore	Hull fouling/Ballast Water	Lim et al. 2017	0.78	1	0	1000	1000	2780	Miralles et al., 2016
10	Callinectes sapidus	-	Italian Seas	Ballast Water	Occhipinti-Ambrogi et al. 2011	1	1	0.562	0.217	0.779	2779	Arias et al., 2014
11	Rhithropanopeus harrisii	-	Italian Seas	Ballast water/ Hull fouling	Occhipinti-Ambrogi et al. 2011	1	1	0.156	0.623	0.779	2779	BOE, 2013
12	Mytilopsis leucophaeata	-	Port of Recife (Brazil)	Hull Fouling	Farrapeira et al., 2007	1	1	0.156	0.610	0.766	2766	BOE, 2013
13	Mnemiopsis leidyi	Atlantic coast of America	Black and Azov Seas	Ballast Water	Volovik et al. 1993	1	1	0.562	0.204	0.766	2766	BOE, 2013
14	Hypnea musciformis	-	Singapore	Hull fouling	Lim et al. 2017	0.75	1	0.156	0.843	0.999	2749	Arias et al., 2014
15	Marenzelleria viridis	-	Baltic Sea	shipping	Panov et al. 2003	1	1	0.562	0.177	0.739	2739	Not Found
16	Ectopleura crocea	Humboldt Bay	San Francisco	Hull fouling	Carlton & Hodder, 1995	0.63	1	0.156	0.843	0.999	2629	Altuna, 2010
17	Watersipora subtorquata*	-	California	Fouling (oil platform)	Page et al., 2006	1	1	0.156	0.437	0.593	2593	This study
18	Arcuatula senhousia	-	Singapore	Ballast Water	Lim et al. 2017	1	1	0.013	0.517	0.530	2530	Bachelet et al., 2009
19	Styela clava	Recreational boating	British Columbia	Hull fouling	Clarke Murray et al. 2011	1	1	0.013	0.517	0.530	2530	Miralles et al., 2016
20	Perna perna	Campos Basin, Brazil (coastal shipping)	Arraial do Cabo (Brazil)	Hull fouling	Ferreira et al., 2006	0.89	1	0.063	0.562	0.625	2515	Ortea Rato, 1977
21	Carijoa riisei	Campos Basin, Brazil (coastal shipping)	Arraial do Cabo (Brazil)	Hull fouling	Ferreira et al., 2006	0.65	1	0.406	0.389	0.795	2445	Not Found
22	Rapana venosa	Asia	Rio de la Plata	Ballast water/ Hull fouling	Pastorino et al. 2000	0.60	1	0.013	0.766	0.779	2379	Goulletquer et al., 2002
23	Asparagopsis armata*	-	Singapore	Hull fouling	Lim et al. 2017	1	1	0	0.373	0.373	2373	Ibabe et al., 2020b
24	Crepidula fornicata	Transoceanic (unknown)	North sea	Ballast water (sediment)	Gollasch, 2002	1	1	0.156	0.217	0.373	2373	Miralles et al., 2016
25	Cordylophora caspia	-	Singapore	Hull fouling/Ballast Water	Lim et al. 2017	0.43	1	0.027	0.909	0.936	2366	BOE, 2013
26	Hydroides elegans	Transoceanic (unknown)	North sea	Ballast water (sediment)	Gollasch, 2002	0.79	1	0	0.530	0.530	2320	Not Found
27	Limnoria tripunctata	Coos Bay	Humboldt Bay	Hull fouling	Carlton & Hodder, 1995	1	0.20	0	1000	1000	2200	Not Found
28	Caprella scaura	-	Italian Seas	Hull fouling	Occhipinti-Ambrogi et al., 2011	1	0.20	0.406	0.593	0.999	2199	Not Found
29	Balanus trigonus*	-	Port of Churchill (Canada)	Hull fouling	Chan et al. 2015	1	0.20	0.169	0.830	0.999	2199	This study
30	Pennaria disticha	Atlantic Ocean	Hawaii	Hull fouling	Eldredge & Smith, 2001	0.97	0.20	0.076	0.923	0.999	2169	Not Found
31	Monocorophium acherusicum	Fremantle port (Australia)	Heard Island (sub-Antarctic )	Hull fouling	Lewis et al., 2004	1	0.20	0	0.930	0.930	2130	Gouillieux, 2019
32	Molgula manhattensis	Humboldt Bay	San Francisco	Hull fouling	Carlton & Hodder, 1995	0.99	0.20	0	0.936	0.936	2126	Vázquez & Urgorri 1992
33	Botrylloides violaceus	Coos Bay	Humboldt Bay	Hull fouling	Carlton & Hodder, 1995	0.59	1	0	0.530	0.530	2120	Miralles et al., 2016
34	Jassa marmorata	Humboldt Bay	San Francisco	Hull fouling	Carlton & Hodder, 1995	0.92	0.20	0.156	0.843	0.999	2119	Gouillieux, 2017
35	Magallana gigas*	Transoceanic (unknown)	North sea	Ballast water	Gollasch, 2002	0.11	1	0.156	0.843	0.999	2109	This study
36	Eudendrium carneum	Red Sea	Italian Seas	Ballast water/ Hull fouling	Occhipinti-Ambrogi et al. 2011	1	0.20	0.562	0.281	0.843	2043	Not Found
37	Amphibalanus amphitrite	California	Hawaii	Hull fouling	Godwin, 2003	1	0.20	0.090	0.752	0.842	2042	Miralles et al., 2016
38	Mya arenaria	North America	Europe	Hull fouling/rock Ballast	Carlton, 2009	0.66	1	0	0.373	0.373	2033	Borja & Muxica, 2001
39	Ascidia sydneiensis	-	Hawaii	Hull fouling	Eldredge & Smith, 2001	1	0.20	0.169	0.653	0.822	2022	Not Found
40	Sphaeroma walkeri*	-	Singapore	Hull fouling/Ballast Water	Lim et al. 2017	0.23	1	0.562	0.196	0.758	1988	Martinez-Laiz et al., 2018
41	Caulerpa taxifolia	-	Singapore	Ballast Water	Lim et al. 2017	0.08	1	0.562	0.196	0.758	1838	BOE, 2013
42	Ampithoe valida	Coos Bay	Humboldt Bay	Hull fouling	Carlton & Hodder, 1995	1	0.20	0	0.623	0.623	1823	Gouillieux, 2017
43	Paracerceis sculpta	-	Valencia, Spain	Hull fouling	Martínez-Laiz et al. 2018	0.90	0.20	0.575	0.090	0.665	1765	Not Found
44	Lysidice collaris	Red Sea	Italian Seas	Ballast water/ Hull fouling	Occhipinti-Ambrogi et al. 2011	0.70	0.20	0.795	0.027	0.822	1722	Not Found
45	Megabalanus tintinnabulum	-	Port of Churchill (Canada)	Hull fouling	Chan et al. 2015	1	0.20	0.339	0.177	0.516	1716	Not Found
46	Amphibalanus subalbidus	-	Port of Recife (Brazil)	Hull Fouling	Farrapeira et al., 2007	1	0	0.562	0	0.562	1562	Not Found
47	Pinguipes brasilianus	-	Italian Seas	Ballast water/ Hull fouling	Occhipinti-Ambrogi et al. 2011	0.92	0.20	0.406	0.027	0.433	1553	Not Found
48	Polycera hedgpethi	California	Western Australia	Hull fouling	Pollard & Hutchings 1990	1	0.20	0.156	0.183	0.339	1539	Cervera et al., 2004
49	Hydroides dianthus	-	Izmir	Hull fouling	Zibrowius, 1991	0.01	1	0.156	0.373	0.529	1539	Goulletquer et al., 2002
50	Polyandrocarpa zorritensis	-	Italian Seas	Ballast water/ Hull fouling	Occhipinti-Ambrogi et al. 2011	0.92	0.20	0.156	0.196	0.352	1472	Not Found
51	Proterorhinus marmoratus	Eurasia	St. Clair river	Ballast water	Mills et al. 1993	0.42	1	0.027	0	0.027	1447	Not Found
52	Cerithium scabridum	Red Sea	Italian Seas	Ballast water/ Hull fouling	Occhipinti-Ambrogi et al. 2011	0.36	1	0	0.027	0.027	1387	Not Found
53	Neogobius melanostomus	Eurasia	St. Clair river	Ballast water	Mills et al. 1993	0.18	1	0.027	0.177	0.204	1384	Not Found
54	Tubastraea coccinea	Campos Basin, Brazil (coastal shipping)	Arraial do Cabo (Brazil)	Hull fouling	Ferreira et al., 2006	0.65	0	0.731	0	0.731	1381	Not Found
55	Loimia medusa	Red Sea	Italian Seas	Ballast water/ Hull fouling	Occhipinti-Ambrogi et al. 2011	1	0	0.352	0	0.352	1352	Martínez & Adarraga, 2011
56	Savignyella lafontii	Campos Basin, Brazil (coastal shipping)	Arraial do Cabo (Brazil)	Hull fouling	Ferreira et al., 2006	0.70	0	0.589	0	0.589	1289	Not Found
57	Limacina helicina	Transoceanic (unknown)	North sea	Ballast water (sediment)	Gollasch, 2002	0.36	0	0.909	0	0.909	1269	Not Found
58	Gonionemus vertens	-	Italian Seas	Ballast Water	Occhipinti-Ambrogi et al. 2011	0.27	0.20	0.013	0.766	0.779	1249	Not Found
59	Halimeda opuntia	Indo-West Pacific	Caribbean	Hull fouling	Kooistra & Verbruggen, 2005	0.24	0.20	0.169	0.562	0.731	1171	Not Found
60	Calanus finmarchicus	St-Petesburg	Strait of Dover	Ballast Water	Olenin et al., 2000	0.77	0	0.333	0	0.333	1103	Not Found
61	Acartia longiremis*	St-Petesburg	Northern Baltic Sea	Ballast Water	Olenin et al., 2000	0.39	0	0.702	0	0.702	1092	Valdés et al., 2007
62	Brachidontes pharaonis	Red Sea	Italian Seas	Ballast water/ Hull fouling	Occhipinti-Ambrogi et al. 2011	0.02	1	0	0.027	0.027	1047	Not Found
63	Fulvia fragilis	Red Sea	Italian Seas	Ballast water/ Hull fouling	Occhipinti-Ambrogi et al. 2011	0.01	1	0	0.027	0.027	1037	Not Found
64	Isognomon bicolor	Campos Basin, Brazil (coastal shipping)	Arraial do Cabo (Brazil)	Hull fouling	Ferreira et al., 2006	0.63	0	0.156	0	0.156	0.786	Not Found
65	Menaethius monoceros	-	Italian Seas	Ballast water/ Hull fouling	Occhipinti-Ambrogi et al. 2011	0.21	0.20	0.156	0.027	0.183	0.593	Not Found
66	Plagusia squamosa	India	Marseille	Hull fouling	Catta, 1876	0.17	0.20	0.156	0.040	0.196	0.566	Not Found
67	Acartia erythraea	Haifa (Israel)	Koper (Slovenia)	Ballast Water (Container ship)	Cabrini et al., 2018	0.38	0	0.013	0	0.013	0.393	Not Found
68	Sabellastarte spectabilis	-	Hawaii	Hull fouling	Eldredge & Smith, 2001	0.02	0.20	0.156	0.013	0.169	0.389	Not Found
69	Balanophyllia elegans	California	Hawaii	Hull fouling	Godwin, 2003	0.34	0	0.013	0	0.013	0.353	Not Found
70	Apeltes quadracus	Atlantic North America	Lake Superior	Shipping	Holm & Hamilton 1988	0.18	0	0.156	0	0.156	0.336	Not Found
71	Corynactis californica	California	Hawaii	Hull fouling	Godwin, 2003	0.14	0	0.013	0	0.013	0.153	Not Found

## Sheet: Supplementary table 4
	Supplementary table 4. The invasion history and the maritime traffic scores for the nonindigenous species with evidences of using maritime traffic as a spreading vector but without available habitat suitability information for the area under study. Those species already detected in the Bay of Biscay are shown in bold whereas species reported within the port of Gijon (shadowed in yellow appear spe…
	EVIDENCES OF USING MARINE TRAFFIC AS A VECTOR					ESTIMATION OF TOTAL INVASION RISK FOR IN GIJON					OBSERVED SCENARIO IN GIJON
	Species	Origin of the vessel	Arrived zone	Transported by	Reference	Habitat suitability score	Invasion history score			Total maritime traffic score	Reference for the species report
								Native traffic ratio	Invaded traffic ratio
1	Amphibalanus reticulatus	-	Port of Recife (Brazil)	Hull Fouling	Farrapeira et al., 2007	-	1	0	1000	1000	Not Found
2	Gymnodinium catenatum	-	Singapore	Ballast water	Lim et al. 2017	-	1	0.160	0.831	1000	Borrell et al., 2017
3	Codium fragile fragile	-	Singapore	Hull fouling	Lim et al. 2017	-	1	0	1000	1000	Altuna et al., 2015
4	Garveia franciscana	-	Italian Seas	Hull fouling	Occhipinti-Ambrogi et al. 2011	-	1	0.156	0.844	1000	Not Found
5	Balanus glandula	Alaska	Japan	Hull fouling	Geller et al. 2008	-	1	0.013	0.960	0.973	Not Found
6	Alitta succinea	-	Singapore	Hull fouling	Lim et al. 2017	-	1	0	0.936	0.936	Not Found
7	Amphibalanus improvisus	Halifax port (Canada)	Port of Churchill (Canada)	Hull fouling	Chan et al. 2016	-	1	0.562	0.374	0.936	Not Found
8	Megabalanus coccopoma	Campos Basin, Brazil (coastal shipping)	Arraial do Cabo (Brazil)	Hull fouling	Ferreira et al., 2006	-	1	0	0.909	0.909	Not Found
9	Schizoporella unicornis	Humboldt Bay	San Francisco	Hull fouling	Carlton & Hodder, 1995	-	1	0.013	0.896	0.909	Reverter-Gil & Fernandez-Pulpeiro, 1999
10	Charybdis hellerii	Campos Basin, Brazil (coastal shipping)	Arraial do Cabo (Brazil)	Hull fouling	Ferreira et al., 2006	-	1	0.064	0.759	0.823	Not Found
11	Phyllorhiza punctata	Philippines	Oahu, Hawaii	Ballast water/ Hull fouling	Eldredge & Smith, 2001	-	1	0.157	0.603	0.760	Not Found
12	Potamopyrgus antipodarum	Australasia	Great Lakes basin	Shipping	Zaranko et al. 1997	-	1	0.157	0.374	0.531	BOE, 2013
13	Didemnum vexillum	Recreational boating	Brittish Columbia	Hull fouling	Herborg et al. 2009	-	1	0.013	0.517	0.530	Not Found
14	Alexandrium catenella	Japanese and Korean coastal waters	Australia	Ballast water	Hallegraeff and Bolch, 1992	-	1	0.156	0.374	0.530	Not Found
15	Pseudopolydora paucibranchiata	Pacific Coast of Canada and USA	Valdez Marine Terminal, Alaska	Ballast Water (Oil tanker)	Darling et al., 2018	-	1	0.013	0.517	0.530	Arias et al., 2014
16	Sargassum muticum	California	Hawaii	Hull fouling	Godwin, 2003	-	1	0	0.530	0.530	Arias et al., 2014
17	Teredo navalis	-	Singapore	Hull fouling	Lim et al. 2017	-	1	0.169	0.361	0.530	Not Found
18	Undaria pinnatifida	New Zealand (coastal shipping)	New Zealand	Hull fouling	Hay, 1990	-	1	0	0.530	0.530	Arias et al., 2014
19	Bonnemaisonia hamifera	-	Italian Seas	Hull fouling	Occhipinti-Ambrogi et al. 2011	-	1	0.013	0.517	0.530	Arias et al., 2014
20	Tricellaria inopinata	-	Italian Seas	Hull fouling	Occhipinti-Ambrogi et al. 2011	-	1	0	0.530	0.530	Souto et al., 2008
21	Austrominius modestus	-	Port of Churchill (Canada)	Hull fouling	Chan et al. 2015	-	1	0.157	0.361	0.518	Miralles et al., 2016
22	Caprella mutica	-	California	Fouling (oil platform)	Page et al., 2006	-	1	0.157	0.346	0.503	Not Found
23	Hydroides ezoensis	Fremantle port (Australia)	Heard Island (sub-Antarctic )	Hull fouling	Lewis et al., 2004	-	1	0.013	0.361	0.374	Not Found
24	Ruditapes philippinarum	Pacific Coast of Canada and USA	Valdez Marine Terminal, Alaska	Ballast Water (Oil tanker)	Darling et al., 2018	-	1	0	0.374	0.374	Arias et al., 2014
25	Dasysiphonia japonica*	-	Singapore	Ballast Water	Lim et al. 2017	-	1	0	0.374	0.374	Ibabe et al., 2020b
26	Eriocheir sinensis	-	Baltic Sea	shipping	Panov et al. 2003	-	1	0	0.374	0.374	BOE, 2013
27	Spirorbis marioni	-	Italian Seas	Hull fouling	Occhipinti-Ambrogi et al. 2011	-	1	0.169	0.204	0.373	Not Found
28	Acrothamnion preissii	-	Italian Seas	Hull fouling	Occhipinti-Ambrogi et al. 2011	-	1	0.157	0.204	0.361	BOE, 2013
29	Lophocladia lallemandii	Red Sea	Italian Seas	Ballast water/ Hull fouling	Occhipinti-Ambrogi et al. 2011	-	1	0.157	0.204	0.361	BOE, 2013
30	Spartina alterniflora	North America	France	Shore Ballast	Bortolus et al. 2015	-	1	0.156	0.190	0.346	Benito & Onaindia 1991
31	Conopeum tenuissimum	Humboldt Bay	San Francisco	Hull fouling	Carlton & Hodder, 1995	-	1	0.156	0.170	0.326	Not Found
32	Cercopagis pengoi	Ponto-Caspian	Lake Ontario	Shipping	MacIsaac et al. 1999	-	1	0.027	0.177	0.204	Not Found
33	Tridentiger trigonocephalus	-	Singapore	Hull fouling/Ballast Water	Lim et al. 2017	-	1	0.013	0.184	0.197	Not Found
34	Womersleyella setacea	-	Italian Seas	Hull fouling	Occhipinti-Ambrogi et al. 2011	-	1	0.013	0.184	0.197	BOE, 2013
35	Cassiopea andromeda	Philippines	Hawaii	Ballast water/ Hull fouling	Eldredge & Smith, 2001	-	1	0.157	0.040	0.197	Not Found
36	Paralithodes camtschaticus	-	Italian Seas	Ballast Water	Occhipinti-Ambrogi et al. 2011	-	1	0.013	0.177	0.190	Not Found
37	Acanthogobius flavimanus	-	Singapore	Hull fouling	Lim et al. 2017	-	1	0.013	0.157	0.170	Not Found
38	Crepidula onyx	California	Hawaii	Hull fouling	Godwin, 2003	-	1	0	0.170	0.170	Arias et al., 2014
39	Sphaeroma quoianum	-	Singapore	Hull fouling	Lim et al. 2017	-	1	0.157	0.013	0.170	Not Found
40	Watersipora arcuata	-	Singapore	Hull fouling	Lim et al. 2017	-	1	0	0.170	0.170	Not Found
41	Potamocorbula amurensis	China	San Francisco Bay	Ballast Water	Carlton, 1999	-	1	0.013	0.157	0.170	BOE, 2013
42	Chthamalus proteus	Marshal Islands	Hawaii	Hull fouling	Godwin, 2003	-	1	0.156	0.013	0.169	Not Found
43	Geukensia demissa	-	Singapore	Ballast water/ Hull fouling	Lim et al. 2017	-	1	0	0.169	0.169	Not Found
44	Portunus pelagicus	-	Italian Seas	Ballast Water	Occhipinti-Ambrogi et al. 2011	-	1	0.064	0.027	0.091	Not Found
45	Branchiomma luctuosum	-	Italian Seas	Ballast water/ Hull fouling	Occhipinti-Ambrogi et al. 2011	-	1	0	0.027	0.027	Not Found
46	Halophila stipulacea	Red Sea	Italian Seas	Ballast water/ Hull fouling	Occhipinti-Ambrogi et al. 2011	-	1	0	0.027	0.027	Not Found
47	Phallusia nigra	-	Hawaii	Hull fouling	Eldredge & Smith, 2001	-	0.20	0	1000	1000	Not Found
48	Elasmopus pectenicrus	Red Sea	Italian Seas	Ballast water/ Hull fouling	Occhipinti-Ambrogi et al. 2011	-	0.20	0.639	0.361	1000	Not Found
49	Pachygrapsus transversus	India	Marseille	Hull fouling	Catta, 1876	-	0	0.987	0	0.987	Not Found
50	Boccardia proboscidea	Japan	Victoria	Ballast water/ Hull fouling	Pollard & Hutchings 1990	-	0.20	0.013	0.960	0.973	Arias et al., 2014
51	Antithamnionella spirographidis	Europe	New South Wales, South Australia	Hull fouling	Pollard & Hutchings 1990	-	0.20	0.169	0.767	0.936	Not Found
52	Psudopolydora paucibranchiata	Japan	Victoria, South Australia and New South Wales	Ballast water/ Hull fouling	Pollard & Hutchings 1990	-	0.20	0	0.936	0.936	Not Found
53	Podolampas spinifera	-	Atlantic coast of Canada	Ballast Water	Roy et al., 2012	-	0	0.936	0	0.936	Not Found
54	Hypnea spinella	-	Italian Seas	Hull fouling	Occhipinti-Ambrogi et al. 2011	-	0.20	0.732	0.204	0.936	Not Found
55	Anguinella palmata	Atlantic coasts	Australia	Hull fouling	Allen, 1953	-	0.20	0	0.817	0.817	Not Found
56	Sphaeroma terebrans	Indian Ocean	Brazil	Hull fouling	Carlton & Ruiz, 2005	-	0.20	0.170	0.626	0.796	Not Found
57	Alexandrium taylori	-	Singapore	Ballast Water	Lim et al. 2017	-	0.20	0	0.767	0.767	Not Found
58	Hydroides dirampha	-	Naples	Hull fouling	Zibrowius, 1991	-	0.20	0	0.759	0.759	Not Found
59	Isolda pulchella	Red Sea	Italian Seas	Ballast water/ Hull fouling	Occhipinti-Ambrogi et al. 2011	-	0.20	0.732	0.027	0.759	Not Found
60	Paradella dianae	California	Western Australia	Hull fouling	Pollard & Hutchings 1990	-	0.20	0.575	0.184	0.759	Not Found
61	Arbopercula tenella	-	Italian Seas	Ballast water/ Hull fouling	Occhipinti-Ambrogi et al. 2011	-	0.20	0.719	0.027	0.746	Not Found
62	Cirrholovenia tetranema	-	Italian Seas	Ballast Water	Occhipinti-Ambrogi et al. 2011	-	0.20	0.576	0.027	0.603	Not Found
63	Distaplia bermudensis	-	Italian Seas	Ballast water/ Hull fouling	Occhipinti-Ambrogi et al. 2011	-	0.20	0.562	0.027	0.589	Not Found
64	Anoplodactylus californicus	Marshall Islands, California	Hawaii	Hull fouling	Godwin, 2003	-	0.20	0.562	0.027	0.589	Not Found
65	Membraniporopsis tubigera	Atlantic coasts	Australia	Hull fouling	Allen, 1953	-	0.20	0	0.576	0.576	Not Found
66	Haliclona caerulea	Caribbean or Eastern Pacific	Oahu and Kauai, Hawaii	Hull fouling	Eldredge & Smith, 2001	-	0.20	0.562	0.013	0.575	Not Found
67	Suberites aurantiacus	Panama	Oahu and Kauai, Hawaii	Hull fouling	Eldredge & Smith, 2001	-	0	0.562	0	0.562	Not Found
68	Alexandrium ostenfeldii	-	Singapore	Ballast Water	Lim et al. 2017	-	0.20	0.157	0.374	0.531	Not Found
69	Amathia distans	Humboldt Bay	San Francisco	Hull fouling	Carlton & Hodder, 1995	-	0.20	0	0.530	0.530	Not Found
70	Asterionella glacialis	St-Petesburg	Strait of Dover	Ballast Water	Olenin et al., 2000	-	0.20	0.326	0.204	0.530	Not Found
71	Caulerpa cylindracea	-	Italian Seas	Ballast water/ Hull fouling	Occhipinti-Ambrogi et al. 2011	-	0.20	0	0.517	0.517	Not Found
72	Tripos longirostrum	-	Atlantic coast of Canada	Ballast Water	Roy et al., 2012	-	0	0.517	0	0.517	Not Found
73	Virididentula dentata	Campos Basin, Brazil (coastal shipping)	Arraial do Cabo (Brazil)	Hull fouling	Ferreira et al., 2006	-	0.20	0.326	0.177	0.503	Not Found
74	Fistulobalanus albicostatus	Osaka (Japan)	Golden Bay (New Zealand)	Fouling (oil platform)	Foster & William 1979	-	0.20	0.170	0.333	0.503	Not Found
75	Microcosmus squamiger*	California	Hawaii	Hull fouling	Godwin, 2003	-	0.20	0	0.438	0.438	Miralles et al., 2016
76	Paraleucilla magna	-	Italian Seas	Hull fouling	Occhipinti-Ambrogi et al. 2011	-	0	0.433	0	0.433	Not Found
77	Distylochus martae	-	Port of Recife (Brazil)	Hull Fouling	Farrapeira et al., 2007	-	0	0.406	0	0.406	Not Found
78	Antithamnion hubbsii	California	Hawaii	Hull fouling	Godwin, 2003	-	0	0.406	0	0.406	Arias et al., 2014
79	Theora lubrica	-	Singapore	Ballast Water	Lim et al. 2017	-	0.20	0.013	0.361	0.374	Arias et al., 2014
80	Amphibalanus eburneus	-	Port of Churchill (Canada)	Hull fouling	Chan et al. 2015	-	0.20	0	0.374	0.374	Miralles et al., 2016
81	Teredo bartschi	-	Singapore	Hull fouling	Lim et al. 2017	-	0.20	0.156	0.217	0.373	Not Found
82	Hypnea cornuta	Red Sea	Italian Seas	Hull fouling	Occhipinti-Ambrogi et al. 2011	-	0.20	0.157	0.204	0.361	Not Found
83	Chondria polyrhiza	-	Italian Seas	Hull fouling	Occhipinti-Ambrogi et al. 2011	-	0.20	0.156	0.204	0.360	Not Found
84	Padina boergesenii	Red Sea	Italian Seas	Ballast water/ Hull fouling	Occhipinti-Ambrogi et al. 2011	-	0.20	0.156	0.204	0.360	Not Found
85	Polysiphonia senticulosa	Pacific Coast of Canada	Victoria	Hull fouling	Pollard & Hutchings 1990	-	0.20	0.013	0.334	0.347	Not Found
86	Hemigrapsus takanoi	Transoceanic (unknown)	North sea	Hull fouling	Gollasch, 2002	-	0.20	0	0.333	0.333	Arias et al., 2014
87	Skeletonema subsalsum	St-Petesburg	Strait of Dover	Ballast Water	Olenin et al., 2000	-	0.20	0	0.333	0.333	Borrell et al., 2017
88	Kofoidinium velleloides	-	Atlantic coast of Canada	Ballast Water	Roy et al., 2012	-	0	0.333	0	0.333	Not Found
89	Laticorophium baconi	-	Singapore	Hull fouling/Ballast Water	Lim et al. 2017	-	0.20	0.156	0.170	0.326	Not Found
90	Symphyocladia marchantioides	-	Italian Seas	Hull fouling	Occhipinti-Ambrogi et al. 2011	-	0.20	0.064	0.204	0.268	Not Found
91	Notomegabalanus algicola	-	Australia	Hull fouling	Allen, 1953	-	0.20	0.064	0.157	0.221	Not Found
92	Polycera capensis	South Africa	New South Wales	Hull fouling	Pollard & Hutchings 1990	-	0.20	0.064	0.157	0.221	Not Found
93	Pseudodiaptomus marinus	North Adriatic Sea	Venice (Italy)	Ballast Water (Container ship)	Cabrini et al., 2018	-	0.20	0.013	0.204	0.217	Not Found
94	Grandidierella japonica	-	Singapore	Ballast Water	Lim et al. 2017	-	0	0	0.217	0.217	Not Found
95	Paracartia grani	North Adriatic Sea	Ancona (Italy)	Ballast Water (Passenger ship)	Cabrini et al., 2018	-	0.20	0.177	0.027	0.204	Not Found
96	Ulva ohnoi	Egypt	Italy	Ballast water	Flagella et al.,2007	-	0.20	0	0.204	0.204	Borrell et al., 2017
97	Antithamnion amphigeneum	-	Italian Seas	Hull fouling	Occhipinti-Ambrogi et al. 2011	-	0.20	0	0.204	0.204	Not Found
98	Botryocladia madagascariensis	-	Italian Seas	Hull fouling	Occhipinti-Ambrogi et al. 2011	-	0.20	0	0.204	0.204	Not Found
99	Ceramium strobiliforme	-	Italian Seas	Hull fouling	Occhipinti-Ambrogi et al. 2011	-	0.20	0	0.204	0.204	Not Found
100	Chondria pygmaea	Red Sea	Italian Seas	Ballast water/ Hull fouling	Occhipinti-Ambrogi et al. 2011	-	0.20	0	0.204	0.204	Not Found
101	Diadumene cincta	-	Italian Seas	Hull fouling	Occhipinti-Ambrogi et al. 2011	-	0.20	0	0.204	0.204	Not Found
102	Daphnia cucullata	-	Atlantic coast of Canada	Ballast Sediment	Briski et al. 2011	-	0	0.204	0	0.204	Not Found
103	Daphnia magna	-	Laurentian lakes	Ballast Sediment	Briski et al. 2011	-	0	0.204	0	0.204	Not Found
104	Daphnia pulex	St-Petesburg	Eastern Gulf of Finland	Ballast Water	Olenin et al., 2000	-	0	0.204	0	0.204	Not Found
105	Abudefduf vaigiensis	-	Italian Seas	Ballast water/ Hull fouling	Occhipinti-Ambrogi et al. 2011	-	0.20	0.170	0.027	0.197	Not Found
106	Spiraulax kofoidii	-	Atlantic coast of Canada	Ballast Water	Roy et al., 2012	-	0	0.197	0	0.197	Not Found
107	Cradoscrupocellaria bertholletii	Campos Basin, Brazil (coastal shipping)	Arraial do Cabo (Brazil)	Hull fouling	Ferreira et al., 2006	-	0.20	0.027	0.157	0.184	Not Found
108	Amphicorina pectinata	-	Italian Seas	Ballast Water	Occhipinti-Ambrogi et al. 2011	-	0.20	0.157	0.027	0.184	Not Found
109	Arachnoidella protecta	-	Italian Seas	Hull fouling	Occhipinti-Ambrogi et al. 2011	-	0.20	0.157	0.027	0.184	Not Found
110	Epinephelus coioides	-	Italian Seas	Ballast water/ Hull fouling	Occhipinti-Ambrogi et al. 2011	-	0.20	0.157	0.027	0.184	Not Found
111	Eudendrium merulum	-	Italian Seas	Ballast water/ Hull fouling	Occhipinti-Ambrogi et al. 2011	-	0.20	0.157	0.027	0.184	Not Found
112	Glabropilumnus laevis	-	Italian Seas	Ballast water/ Hull fouling	Occhipinti-Ambrogi et al. 2011	-	0.20	0.157	0.027	0.184	Not Found
113	Thalamita gloriensis	-	Italian Seas	Ballast water/ Hull fouling	Occhipinti-Ambrogi et al. 2011	-	0.20	0.157	0.027	0.184	Not Found
114	Celleporella carolinensis	-	Italian Seas	Hull fouling	Occhipinti-Ambrogi et al. 2011	-	0.20	0.156	0.027	0.183	Not Found
115	Crepidacantha poissonii	-	Italian Seas	Hull fouling	Occhipinti-Ambrogi et al. 2011	-	0.20	0.156	0.027	0.183	Not Found
116	Linopherus canariensis	-	Italian Seas	Ballast water/ Hull fouling	Occhipinti-Ambrogi et al. 2011	-	0.20	0.156	0.027	0.183	Not Found
117	Longibrachium atlanticum	-	Italian Seas	Ballast water/ Hull fouling	Occhipinti-Ambrogi et al. 2011	-	0.20	0.156	0.027	0.183	Not Found
118	Novafabricia infratorquata	-	Italian Seas	Ballast water/ Hull fouling	Occhipinti-Ambrogi et al. 2011	-	0.20	0.156	0.027	0.183	Not Found
119	Magallana angulata	Western North Pacific	Southern Europe	Hull fouling/Ballast	Cross et al. 2016	-	0.20	0	0.177	0.177	Not Found
120	Binuclearia lauterbornii	St-Petesburg	Strait of Dover	Ballast Water	Olenin et al., 2000	-	0	0.177	0	0.177	Not Found
121	Cryptomonas ovata	St-Petesburg	Strait of Dover	Ballast Water	Olenin et al., 2000	-	0	0.177	0	0.177	Not Found
122	Dreissena rostriformis bugensis	Ponto-Caspian	Great Lakes basin	Shipping	May & Marsden 1992	-	0	0.177	0	0.177	Not Found
123	Echinogammarus ischnus	Ponto-Caspian	Great Lakes basin	Shipping	Witt et al. 1997	-	0	0.177	0	0.177	Not Found
124	Gymnocephalus cernua	Eurasia	St. Louis river	Ballast water	Mills et al. 1993	-	0	0.177	0	0.177	Not Found
125	Rhizosolenia minima	St-Petesburg	Strait of Zund	Ballast Water	Olenin et al., 2000	-	0	0.177	0	0.177	Not Found
126	Tesseropora atlantica	Campos Basin, Brazil (coastal shipping)	Arraial do Cabo (Brazil)	Hull fouling	Ferreira et al., 2006	-	0	0.177	0	0.177	Not Found
127	Botrylloides perspicuus	California	Hawaii	Hull fouling	Godwin, 2003	-	0.20	0.157	0.013	0.170	Not Found
128	Symplegma reptans	California	Hawaii	Hull fouling	Godwin, 2003	-	0.20	0.157	0.013	0.170	Not Found
129	Cirolana harfordi	West Coast of USA	Victoria, New South Wales and Western Australia	Hull fouling	Pollard & Hutchings 1990	-	0.20	0.013	0.157	0.170	Not Found
130	Crucibulum spinosum	Philippines	Hawaii	Hull fouling	Eldredge & Smith, 2001	-	0.20	0.157	0.013	0.170	Not Found
131	Gonodactylaceus falcatus	South China Sea and Philippines	Oahu, Hawaii	Hull fouling	Eldredge & Smith, 2001	-	0.20	0.157	0.013	0.170	Not Found
132	Mycale armata	Australia	Oahu and Maui, Hawaii	Hull fouling	Eldredge & Smith, 2001	-	0.20	0.157	0.013	0.170	Not Found
133	Pachygrapsus fakaravensis	French Polynesia or Japan	Oahu, Hawaii	Ballast Water	Eldredge & Smith, 2001	-	0.20	0.157	0.013	0.170	Not Found
134	Licornia diadema	Campos Basin, Brazil (coastal shipping)	Arraial do Cabo (Brazil)	Hull fouling	Ferreira et al., 2006	-	0	0.170	0	0.170	Not Found
135	Brachioglossum bipinnatifidum	California	Hawaii	Hull fouling	Godwin, 2003	-	0	0.170	0	0.170	Not Found
136	Crepidula lingulata	California	Hawaii	Hull fouling	Godwin, 2003	-	0	0.170	0	0.170	Not Found
137	Mycale parishii	-	Oahu and Maui, Hawaii	Hull fouling	Eldredge & Smith, 2001	-	0	0.170	0	0.170	Not Found
138	Okenia eolida	Japan	Queensland, Victoria and New South Wales	Hull fouling	Pollard & Hutchings 1990	-	0	0.170	0	0.170	Not Found
139	Synagrops japonicus	-	Italian Seas	Ballast water/ Hull fouling	Occhipinti-Ambrogi et al. 2011	-	0	0.170	0	0.170	Not Found
140	Chama macerophylla	Caribbean	Pearl Harbor, Oahu, Hawaii	Hull fouling	Eldredge & Smith, 2001	-	0.20	0.156	0.013	0.169	Not Found
141	Callithamnion acutum	California	Hawaii	Hull fouling	Godwin, 2003	-	0	0.169	0	0.169	Not Found
142	Megabalanus rosa	Osaka (Japan)	Golden Bay (New Zealand)	Fouling (oil platform)	Foster & William 1979	-	0.20	0	0.157	0.157	Not Found
143	Hyotissa numisma	-	Atlantic coast of Canada	Ballast Sediment	Briski et al. 2011	-	0	0.157	0	0.157	Not Found
144	Guinusia dentipes	Japan	California	Fouling (oil platform)	Benech, 1978	-	0	0.157	0	0.157	Not Found
145	Eurylana arcuata	New Zealand and Chile	New South Wales and South Australia	Ballast water/ Hull fouling	Pollard & Hutchings 1990	-	0	0.157	0	0.157	Not Found
146	Halicarcinus quoyi	New Zealand	Tasmania and Victoria	Hull fouling	Pollard & Hutchings 1990	-	0	0.157	0	0.157	Not Found
147	Zeacumantus subcarinatus	New Zealand	Sydney	Ballast water/ Hull fouling	Hayward, 1997	-	0	0.157	0	0.157	Not Found
148	Pilumnus floridanus	Campos Basin, Brazil (coastal shipping)	Arraial do Cabo (Brazil)	Hull fouling	Ferreira et al., 2006	-	0	0.156	0	0.156	Not Found
149	Breviturma paucigranulata	Campos Basin, Brazil (coastal shipping)	Arraial do Cabo (Brazil)	Hull fouling	Ferreira et al., 2006	-	0	0.156	0	0.156	Not Found
150	Paronychocamptus huntsmani	-	Port of Churchill (Canada)	Hull fouling	Chan et al. 2015	-	0	0.156	0	0.156	Not Found
151	Clytia hummelincki	-	Italian Seas	Hull fouling	Occhipinti-Ambrogi et al. 2011	-	0.20	0.064	0.027	0.091	Not Found
152	Godiva quadricolor	-	Singapore	Ballast water/ Hull fouling	Lim et al. 2017	-	0.20	0.064	0.027	0.091	Not Found
153	Pista unibranchia	-	Italian Seas	Hull fouling	Occhipinti-Ambrogi et al. 2011	-	0.20	0.064	0.027	0.091	Not Found
154	Plocamium secundatum	-	Italian Seas	Hull fouling	Occhipinti-Ambrogi et al. 2011	-	0.20	0.064	0.027	0.091	Not Found
155	Pomadasys stridens	-	Italian Seas	Ballast water/ Hull fouling	Occhipinti-Ambrogi et al. 2011	-	0.20	0.064	0.027	0.091	Not Found
156	Protodorvillea egena	-	Italian Seas	Ballast Water	Occhipinti-Ambrogi et al. 2011	-	0.20	0.064	0.027	0.091	Not Found
157	Ianiropsis serricaudis	-	Ferrol, Spain	Hull fouling	Martínez-Laiz et al. 2018	-	0.20	0.013	0.027	0.040	Not Found
158	Oithona brevicornis	North Adriatic Sea	Venice (Italy)	Ballast Water (Container ship)	Cabrini et al., 2018	-	0.20	0.013	0.027	0.040	Not Found
159	Celleporaria brunnea	California	Hawaii	Hull fouling	Godwin, 2003	-	0.20	0.013	0.027	0.040	Not Found
160	Monia nobilis	Indo-West Pacific	Hawaii	Hull fouling	Eldredge & Smith, 2001	-	0.20	0.027	0.013	0.040	Not Found
161	Ophryotrocha diadema	-	Italian Seas	Ballast water/ Hull fouling	Occhipinti-Ambrogi et al. 2011	-	0.20	0.013	0.027	0.040	Not Found
162	Acromegalomma claparedei	-	Italian Seas	Hull fouling	Occhipinti-Ambrogi et al. 2011	-	0.20	0	0.027	0.027	Not Found
163	Charybdis lucifera	-	Italian Seas	Ballast water/ Hull fouling	Occhipinti-Ambrogi et al. 2011	-	0.20	0	0.027	0.027	Not Found
164	Diopatra hupferiana hupferiana	-	Italian Seas	Ballast Water	Occhipinti-Ambrogi et al. 2011	-	0.20	0	0.027	0.027	Not Found
165	Diopatra hupferiana monroi	-	Italian Seas	Ballast Water	Occhipinti-Ambrogi et al. 2011	-	0.20	0	0.027	0.027	Not Found
166	Elates ransonnettii	Red Sea	Italian Seas	shipping	Occhipinti-Ambrogi et al. 2011	-	0.20	0	0.027	0.027	Not Found
167	Ophryotrocha japonica	-	Italian Seas	Ballast Water	Occhipinti-Ambrogi et al. 2011	-	0.20	0	0.027	0.027	Not Found
168	Thelepus comatus	-	Italian Seas	Ballast Water	Occhipinti-Ambrogi et al. 2011	-	0.20	0	0.027	0.027	Not Found
169	Calanus euxinus	Black Sea	Trieste (Italy)	Ballast Water (Oil tanker)	Cabrini et al., 2018	-	0	0.027	0	0.027	Not Found
170	Sphaeromyxa sevastopoli	Black Sea basin	Great Lakes basin	Shipping	Pronin et al. 1998	-	0	0.027	0	0.027	Not Found
171	Scolionema suvaense	-	Italian Seas	Ballast Water	Occhipinti-Ambrogi et al. 2011	-	0	0.027	0	0.027	Not Found
172	Gelliodes fibrosa	Philippines	Oahu, Maui and Kauai, Hawaii	Hull fouling	Eldredge & Smith, 2001	-	0.20	0	0.013	0.013	Not Found
173	Megabalanus californicus	Marshall Islands, California	Hawaii	Hull fouling	Godwin, 2003	-	0	0.013	0	0.013	Not Found
174	Ceramium gardneri	California	Hawaii	Hull fouling	Godwin, 2003	-	0	0.013	0	0.013	Not Found
175	Pseudopolydora reticulata	Pacific Coast of Canada and USA	Valdez Marine Terminal, Alaska	Ballast Water (Oil tanker)	Darling et al., 2018	-	0	0.013	0	0.013	Not Found
176	Schizopera clandestina	-	Port of Churchill (Canada)	Hull fouling	Chan et al. 2015	-	0	0.013	0	0.013	Not Found
177	Gmelinoides fasciatus	-	Baltic Sea	shipping	Panov et al. 2003	-	0	0.013	0	0.013	Not Found
178	Lumbrineris acutiformis	-	Italian Seas	Ballast Water	Occhipinti-Ambrogi et al. 2011	-	0	0.013	0	0.013	Not Found
179	Pherusella brevituba	-	Italian Seas	Hull fouling	Occhipinti-Ambrogi et al. 2011	-	0	0.013	0	0.013	Not Found
180	Megabalanus volcano	Osaka (Japan)	Golden Bay (New Zealand)	Fouling (oil platform)	Foster & William 1979	-	0	0	0	-	Not Found
181	Striatobalanus amaryllis	-	Port of Recife (Brazil)	Hull Fouling	Farrapeira et al., 2007	-	0	0	0	-	Not Found

## Sheet: Supplementary table 5
	Supplementary table 5. Species with evidences of using marine traffic as a vector that are native to the port of Gijon. Species are classified based on their invasion history score: group 0 (for those species only present in their native habitat and without known introduction events), group 0.2 (for species that have been introduced outside their native range but do not cause any known impact) an…
	Class	Species	EVIDENCES OF USING MARINE TRAFFIC AS A VECTOR				Invasion history score
			Origin of the vessel	Arrived zone	Transported by	Reference
1	Anthozoa	Oculina patagonica	Argentina	Gulf of Genoa	Hull fouling	Zibrowius, 1974	1
2	Ascidiacea	Ciona intestinalis	-	Singapore	Hull fouling	Lim et al., 2017	1
3	Ascidiacea	Ascidiella aspersa	-	Singapore	Hull fouling	Lim et al., 2017	1
4	Bivalvia	Mytilus galloprovincialis	North America	Hawaii	Ballast water (submarine)	Apte et al., 2000	1
5	Dinophyceae	Alexandrium minutum	Japan	Australia	Ballast water	Hallegraeff and Bolch, 1992	1
6	Dinophyceae	Dinophysis acuminata	St-Petesburg	Strait of Dover	Ballast Water	Olenin et al., 2000	1
7	Dinophyceae	Prorocentrum cordatum	St-Petesburg	Northern Baltic Sea	Ballast Water	Olenin et al., 2000	1
8	Dinophyceae	Alexandrium tamarense	-	Singapore	Ballast Water	Lim et al., 2017	1
9	Gastropoda	Littorina littorea	Europe	Canada	Rock Ballast	Chapman, 2007	1
10	Gymnolaemata	Membranipora membranacea	Pacific Coast of Canada and USA	Valdez Marine Terminal, Alaska	Ballast Water (Oil tanker)	Darling et al., 2018	1
11	Gymnolaemata	Cryptosula pallasiana	-	Singapore	Hull fouling	Lim et al., 2017	1
12	Malacostraca	Carcinus maenas	Europe	North America	Hull fouling/rock Ballast	Edgell & Hollander, 2011	1
13	Malacostraca	Percnon gibbesi	-	Italian Seas	Ballast Water	Occhipinti-Ambrogi et al., 2011	1
14	Nuda	Beroe ovata	-	Italian Seas	Ballast Water	Occhipinti-Ambrogi et al., 2011	1
15	Polychaeta	Sabella spallanzanii	Mediterranean Sea	Port Phillip Bay, Australia	Hull fouling	Currie et al., 2000	1
16	Polychaeta	Desdemona ornata	-	Italian Seas	Ballast Water	Occhipinti-Ambrogi et al., 2011	1
17	Anthozoa	Diadumene leucolena	California	Hawaii	Hull fouling	Godwin, 2003	0.2
18	Ascidiacea	Didemnum candidum	-	Hawaii	Hull fouling	Eldredge & Smith, 2001	0.2
19	Bacillariophyceae	Pseudo-nitzschia seriata	St-Petesburg	Strait of Dover	Ballast Water	Olenin et al., 2000	0.2
20	Clitellata	Paranais frici	-	Baltic Sea	Shipping	Panov et al. 2003	0.2
21	Dinophyceae	Alexandrium affine	-	Singapore	Ballast Water	Lim et al., 2017	0.2
22	Dinophyceae	Phalacroma mitra	-	Atlantic coast of Canada	Ballast Water	Roy et al., 2012	0.2
23	Dinophyceae	Tripos candelabrum	-	Atlantic coast of Canada	Ballast Water	Roy et al., 2012	0.2
24	Dinophyceae	Tripos furca	Transoceanic (unknown)	Atlantic coast of Canada	Ballast Water	Roy et al., 2012	0.2
25	Dinophyceae	Tripos muelleri	-	Atlantic coast of Canada	Ballast Water	Roy et al., 2012	0.2
26	Dinophyceae	Dinophysis caudata	-	Atlantic coast of Canada	Ballast Water	Roy et al., 2012	0.2
27	Dinophyceae	Dinophysis odiosa	-	Atlantic coast of Canada	Ballast Water	Roy et al., 2012	0.2
28	Florideophyceae	Leptosiphonia brodiei	Japan	South Australia	Hull fouling	Pollard & Hutchings 1990	0.2
29	Florideophyceae	Aglaothamnion feldmanniae	-	Italian Seas	Ballast water/ Hull fouling	Occhipinti-Ambrogi et al. 2011	0.2
30	Gastropoda	Myosotella myosotis	-	Singapore	Hull fouling	Lim et al. 2017	0.2
31	Gastropoda	Littorina saxatilis	Western Europe	Adriatic Sea	Rock Ballast	Panova et al. 2011	0.2
32	Gastropoda	Tenellia adspersa	Coos Bay	Humboldt Bay	Hull fouling	Carlton & Hodder, 1995	0.2
33	Gastropoda	Thecacera pennigera	-	New South Wales	Hull fouling	Pollard & Hutchings 1990	0.2
34	Gymnolaemata	Crisularia serrata	-	Italian Seas	Hull fouling	Occhipinti-Ambrogi et al. 2011	0.2
35	Gymnolaemata	Amathia gracilis	Humboldt Bay	San Francisco	Hull fouling	Carlton & Hodder, 1995	0.2
36	Gymnolaemata	Bugulina flabellata	California	Hawaii	Hull fouling	Godwin, 2003	0.2
37	Gymnolaemata	Cradoscrupocellaria bertholletii	Campos Basin, Brazil (coastal shipping)	Arraial do Cabo (Brazil)	Hull fouling	Ferreira et al., 2006	0.2
38	Hexanauplia	Pseudocalanus elongatus	St-Petesburg	Strait of Dover	Ballast Water	Olenin et al., 2000	0.2
39	Hydrozoa	Bougainvillia muscus	Northern hemisphere	New South Wales	Hull fouling	Pollard & Hutchings 1990	0.2
40	Malacostraca	Monocorophium insidiosum	-	Singapore	Hull fouling	Lim et al. 2017	0.2
41	Malacostraca	Crassicorophium bonellii	-	Port of Churchill (Canada)	Hull fouling	Chan et al. 2015	0.2
42	Phaeophyceae	Striaria attenuata	New Zealand	New South Wales	Ballast water/ Hull fouling	Pollard & Hutchings 1990	0.2
43	Phaeophyceae	Stictyosiphon soriferus	Mediterranean	South Australia	Ballast water/ Hull fouling	Pollard & Hutchings 1990	0.2
44	Polychaeta	Salmacina dysteri	-	Hawaii	Hull fouling	Eldredge & Smith, 2001	0.2
45	Pycnogonida	Ammothea hilgendorf	Red Sea	Italian Seas	Ballast water/ Hull fouling	Occhipinti-Ambrogi et al. 2011	0.2
46	Ulvophyceae	Ulva lactuca	-	Singapore	Hull fouling	Lim et al. 2017	0.2
47	Ulvophyceae	Cladophora sericea	-	Singapore	Hull fouling	Lim et al. 2017	0.2
48	Ulvophyceae	Ulva intestinalis	Fremantle port (Australia)	Heard Island (sub-Antarctic )	Hull fouling	Lewis et al., 2004	0.2
49	Bacillariophyceae	Actinoptychus splendens	Mediterranean	Port of Annaba, Algeria.	Ballast Water	Cheniti et al., 2018	0
50	Bacillariophyceae	Chaetoceros similis	St-Petesburg	Northern Baltic Sea	Ballast Water	Olenin et al., 2000	0
51	Bacillariophyceae	Chaetoceros wighamii	St-Petesburg	Strait of Dover	Ballast Water	Olenin et al., 2000	0
52	Bacillariophyceae	Coscinodiscus asteromphalus	Mediterranean	Port of Annaba, Algeria.	Ballast Water	Cheniti et al., 2018	0
53	Bacillariophyceae	Coscinodiscus lineatus	Mediterranean	Port of Annaba, Algeria.	Ballast Water	Cheniti et al., 2018	0
54	Bacillariophyceae	Lauderia confervacea	St-Petesburg	Strait of Zund	Ballast Water	Olenin et al., 2000	0
55	Bacillariophyceae	Leptocylindrus danicus	St-Petesburg	Strait of Dover	Ballast Water	Olenin et al., 2000	0
56	Bacillariophyceae	Leptocylindrus minimus	St-Petesburg	Strait of Dover	Ballast Water	Olenin et al., 2000	0
57	Bacillariophyceae	Rhizosolenia delicatula	St-Petesburg	Strait of Zund	Ballast Water	Olenin et al., 2000	0
58	Bacillariophyceae	Rhizosolenia flaccida	St-Petesburg	Strait of Dover	Ballast Water	Olenin et al., 2000	0
59	Bacillariophyceae	Rhizosolenia fragilissima fragilissima	St-Petesburg	Strait of Zund	Ballast Water	Olenin et al., 2000	0
60	Bacillariophyceae	Skeletonema costatum	St-Petesburg	Eastern Gulf of Finland	Ballast Water	Olenin et al., 2000	0
61	Bacillariophyceae	Thalassiosira decipiens	Mediterranean	Port of Annaba, Algeria.	Ballast Water	Cheniti et al., 2018	0
62	Branchiopoda	Bosmina coregoni	St-Petesburg	Strait of Zund	Ballast Water	Olenin et al., 2000	0
63	Branchiopoda	Bythotrephes longimanus	Eurasia	Lake Huron	Ballast water	Mills et al. 1993	0
64	Branchiopoda	Evadne nordmanni	St-Petesburg	Northern Baltic Sea	Ballast Water	Olenin et al., 2000	0
65	Branchiopoda	Pleopis polyphemoides	-	Laurentian lakes	Ballast Sediment	Briski et al. 2011	0
66	Branchiopoda	Podon intermedius	-	Laurentian lakes	Ballast Sediment	Briski et al. 2011	0
67	Chromadorea	Chromadorina erythrophthalma	Halifax port (Canada)	Nanisivik (Canada)	Hull fouling	Chan et al. 2016	0
68	Chromadorea	Daptonema tenuispiculum	-	Port of Churchill (Canada)	Ballast Water	Chan et al. 2015	0
69	Chromadorea	Prochromadora orleji	-	Port of Churchill (Canada)	Hull fouling	Chan et al. 2015	0
70	Cryptophyceae	Teleaulax acuta	St-Petesburg	Strait of Dover	Ballast Water	Olenin et al., 2000	0
71	Cyanophyceae	Nodularia spumigena	St-Petesburg	Strait of Dover	Ballast Water	Olenin et al., 2000	0
72	Dinophyceae	Tripos inflatus	-	Atlantic coast of Canada	Ballast Water	Roy et al., 2012	0
73	Dinophyceae	Tripos teres	-	Atlantic coast of Canada	Ballast Water	Roy et al., 2012	0
74	Dinophyceae	Corythodinium curvicaudatum	-	Atlantic coast of Canada	Ballast Water	Roy et al., 2012	0
75	Dinophyceae	Corythodinium diploconus	-	Atlantic coast of Canada	Ballast Water	Roy et al., 2012	0
76	Dinophyceae	Oxytoxum michaelsarsii	-	Atlantic coast of Canada	Ballast Water	Roy et al., 2012	0
77	Dinophyceae	Dinophysis pulchella	-	Atlantic coast of Canada	Ballast Water	Roy et al., 2012	0
78	Dinophyceae	Goniodoma sphaericum	-	Atlantic coast of Canada	Ballast Water	Roy et al., 2012	0
79	Dinophyceae	Gonyaulax scrippsae	-	Atlantic coast of Canada	Ballast Water	Roy et al., 2012	0
80	Dinophyceae	Gyrodinium crassum	-	Atlantic coast of Canada	Ballast Water	Roy et al., 2012	0
81	Dinophyceae	Heterocapsa triquetra	St-Petesburg	Northern Baltic Sea	Ballast Water	Olenin et al., 2000	0
82	Dinophyceae	Oblea rotunda	St-Petesburg	Strait of Dover	Ballast Water	Olenin et al., 2000	0
83	Dinophyceae	Podolampas palmipes	-	Atlantic coast of Canada	Ballast Water	Roy et al., 2012	0
84	Dinophyceae	Polykrikos kofoidi	NE Atlantic	Port of Annaba, Algeria.	Ballast Water	Cheniti et al., 2018	0
85	Dinophyceae	Preperidinium meunieri	St-Petesburg	Eastern Gulf of Finland	Ballast Water	Olenin et al., 2000	0
86	Dinophyceae	Prorocentrum scutellum	Mediterranean	Port of Annaba, Algeria.	Ballast Water	Cheniti et al., 2018	0
87	Dinophyceae	Protoperidinium curtipes	-	Atlantic coast of Canada	Ballast Water	Roy et al., 2012	0
88	Dinophyceae	Protoperidinium oceanicum	-	Atlantic coast of Canada	Ballast Water	Roy et al., 2012	0
89	Dinophyceae	Pyrophacus horologium	-	Atlantic coast of Canada	Ballast Water	Roy et al., 2012	0
90	Dinophyceae	Scrippsiella hangoei	St-Petesburg	Strait of Dover	Ballast Water	Olenin et al., 2000	0
91	Dinophyceae	Triadinium polyedricum	-	Atlantic coast of Canada	Ballast Water	Roy et al., 2012	0
92	Dinophyceae	Tripos arietinus	-	Atlantic coast of Canada	Ballast Water	Roy et al., 2012	0
93	Dinophyceae	Tripos azoricus	-	Atlantic coast of Canada	Ballast Water	Roy et al., 2012	0
94	Dinophyceae	Tripos compressus	-	Atlantic coast of Canada	Ballast Water	Roy et al., 2012	0
95	Dinophyceae	Tripos pentagonus	-	Atlantic coast of Canada	Ballast Water	Roy et al., 2012	0
96	Dinophyceae	Tripos pulchellus	-	Atlantic coast of Canada	Ballast Water	Roy et al., 2012	0
97	Dinophyceae	Alexandrium hiranoi	Pacific Coast of Canada and USA	Valdez Marine Terminal, Alaska	Ballast Water (Oil tanker)	Darling et al., 2018	0
98	Florideophyceae	Aglaothamnion cordatum	California	Hawaii	Hull fouling	Godwin, 2003	0
99	Florideophyceae	Ceramium gaditanum	Netherlands	Sète (Mediterranean coast of France)	Hull fouling	Mineur et al., 2007	0
100	Gymnolaemata	Microporella ciliata	Campos Basin, Brazil (coastal shipping)	Arraial do Cabo (Brazil)	Hull fouling	Ferreira et al., 2006	0
101	Gymnolaemata	Parasmittina trispinosa	Campos Basin, Brazil (coastal shipping)	Arraial do Cabo (Brazil)	Hull fouling	Ferreira et al., 2006	0
102	Gymnolaemata	Scruparia ambigua	Campos Basin, Brazil (coastal shipping)	Arraial do Cabo (Brazil)	Hull fouling	Ferreira et al., 2006	0
103	Gymnolaemata	Watersipora cucullata	-	Australia	Hull fouling	Allen, 1953	0
104	Hexanauplia	Centropages hamatus	St-Petesburg	Strait of Dover	Ballast Water	Olenin et al., 2000	0
105	Hexanauplia	Centropages typicus	-	Port of Churchill (Canada)	Ballast Water	Chan et al. 2015	0
106	Hexanauplia	Conchoderma auritum	-	Port of Churchill (Canada)	Hull fouling	Chan et al. 2015	0
107	Hexanauplia	Conchoderma virgatum	-	Port of Recife (Brazil)	Hull Fouling	Farrapeira et al., 2007	0
108	Hexanauplia	Eurytemora hirundoides	St-Petesburg	Strait of Dover	Ballast Water	Olenin et al., 2000	0
109	Hexanauplia	Harpacticus obscurus	Halifax port (Canada)	Port of Churchill (Canada)	Hull fouling	Chan et al. 2016	0
110	Hexanauplia	Heterolaophonte stroemii	-	Port of Churchill (Canada)	Ballast Water	Chan et al. 2015	0
111	Hexanauplia	Onychocamptus mohammed	Holarctic area	Great Lakes basin	Shipping	Reid & Hudson, 2008	0
112	Hexanauplia	Paracalanus parvus parvus	St-Petesburg	Strait of Dover	Ballast Water	Olenin et al., 2000	0
113	Hexanauplia	Acartia clausi	St-Petesburg	Strait of Dover	Ballast Water	Olenin et al., 2000	0
114	Hexanauplia	Temora longicornis	St-Petesburg	Strait of Dover	Ballast Water	Olenin et al., 2000	0
115	Hydrozoa	Clytia hemisphaerica	Fremantle port (Australia)	Heard Island (sub-Antarctic )	Hull fouling	Lewis et al., 2004	0
116	Malacostraca	Chondrochelia savignyi	Yaquina Bay	Coos Bay	Hull fouling	Carlton & Hodder, 1995	0
117	Malacostraca	Elasmopus rapax	Hawaii	West Cost of Canada	Hull fouling	Frey et al., 2014	0
118	Malacostraca	Jassa falcata	Marshall Islands	Hawaii	Hull fouling	Godwin, 2003	0
119	Malacostraca	Neomysis integer	Pacific Coast of Canada and USA	Valdez Marine Terminal, Alaska	Ballast Water (Oil tanker)	Darling et al., 2018	0
120	Malacostraca	Planes minutus	India	Marseille	Hull fouling	Catta, 1876	0
121	Malacostraca	Stenothoe valida	Humboldt Bay	San Francisco	Hull fouling	Carlton & Hodder, 1995	0
122	Malacostraca	Monocorophium sextonae	-	Singapore	Ballast water/ Hull fouling	Lim et al. 2017	0
123	Petromyzonti	Petromyzon marinus	Atlantic ocean	Lake Ontario	Hull fouling	Mills et al. 1993	0
124	Phaeophyceae	Arthrocladia villosa	Temperate North Atlantic or Mediterranean	South Australia	Ballast water/ Hull fouling	Pollard & Hutchings 1990	0
125	Polychaeta	Hydroides norvegica	European coasts	Australia	Hull fouling	Pollard & Hutchings 1990	0
126	Trematoda	Ichthyocotylurus pileatus	Black Sea basin	Great Lakes basin	Shipping	Pronin et al. 1997	0
127	Ulvophyceae	Chaetomorpha aerea	Brazil	Sète (Mediterranean coast of France)	Hull fouling	Mineur et al., 2007	0
128	Ulvophyceae	Ulva rigida	Fremantle port (Australia)	Heard Island (sub-Antarctic )	Hull fouling	Lewis et al., 2004	0

## Sheet: Supplementary table 6 
	Supplementary table 6. All sampled and genetically identified biota from the different stations of the Port of Gijon (stations A, B, C, D and the Marina) and from the studied vessels (S1, S2 and S3). The number of individuals is given per year and per area. Species that were only found attached to the hulls of ships are marked with an asterisk. Those species marked with plus symbol (+) are coloni…
	Class	Species	Status in Gijon	2016					2017					Vessels
				Mar	A	B	C	D	Mar	A	B	C	D	S3	S2	S1
1	Actinopterygii	Diplodus vulgaris	N	1	1	0	0	0	0	0	0	0	0	0	0	0
2	Anthozoa	Anemonia viridis	N	0	0	0	0	0	0	0	0	0	1	0	0	0
3	Anthozoa	Anthopleura anjunae	NIS	0	0	0	1	0	0	0	0	1	0	0	0	0
4	Anthozoa	Anthopleura elegantissima	NIS	0	0	2	0	0	0	1	1	0	0	0	0	0
5	Anthozoa	Caryophyllia grayi	NIS	0	0	0	0	0	1	0	0	0	0	0	0	0
6	Anthozoa	Pourtalosmilia anthophyllites	N	0	0	2	0	0	0	0	0	0	0	0	0	0
7	Ascidiacea	Clavelina lepadiformis	N	1	0	0	0	0	0	1	0	0	0	2	0	0
8	Ascidiacea	Diplosoma listerianum*+	C	0	0	0	0	0	0	0	0	0	0	3	0	0
9	Ascidiacea	Microcosmus squamiger	NIS	0	0	0	0	0	1	0	0	0	0	0	0	0
10	Asteroidea	Marthasterias glacialis	N	0	0	0	0	0	0	0	3	0	0	0	0	0
11	Bivalvia	Lasaea adansoni	N	0	0	1	0	0	0	0	0	0	0	0	0	0
12	Bivalvia	Magallana gigas	IAS	0	0	12	6	0	0	2	6	6	0	0	0	0
13	Bivalvia	Mimachlamys varia	N	1	0	0	0	0	0	0	0	0	0	0	0	0
14	Bivalvia	Mytilaster minimus	C	1	7	9	6	2	1	4	6	0	2	0	0	0
15	Bivalvia	Mytilus sp	-	0	0	1	1	0	2	0	2	2	0	0	4	0
16	Bivalvia	Mytilus edulis	N	0	0	2	1	3	0	0	0	0	0	0	0	0
17	Bivalvia	Mytilus galloprovincialis	N	0	1	1	4	2	1	1	4	1	1	0	3	0
18	Bivalvia	Mytilus trossulus	NIS	0	0	0	1	0	1	2	0	2	0	0	0	0
19	Bivalvia	Ostrea stentina	NIS	1	1	0	0	0	0	0	0	0	0	0	0	0
20	Bivalvia	Striarca lactea	N	0	0	0	0	0	0	0	2	0	0	0	0	0
21	Bivalvia	Talochlamys multistriata	NIS	0	0	0	0	0	0	0	2	0	0	0	0	0
22	Bivalvia	Ostrea edulis	N	0	0	0	2	0	0	0	0	0	2	0	0	0
23	Demospongiae	Hymeniacidon sp.+	-	0	0	0	0	0	0	0	0	1	0	0	0	0
24	Echinoidea	Paracentrotus lividus	N	0	0	0	0	0	1	0	1	0	0	0	0	0
25	Gastropoda	Gibbula cineraria	N	0	0	0	1	0	0	0	1	0	0	0	0	0
26	Gastropoda	Gibbula umbilicalis	N	0	1	1	4	0	0	5	2	2	1	0	0	0
27	Gastropoda	Melarhaphe neritoides	N	0	0	0	0	0	0	2	2	2	1	0	0	0
28	Gastropoda	Ocenebra erinaceus	N	0	0	0	1	0	0	0	0	0	0	0	0	0
29	Gastropoda	Ocinebrina sp.	-	0	0	0	0	0	0	0	1	0	0	0	0	0
30	Gastropoda	Nassarius incrassatus	N	0	1	2	0	0	0	0	1	0	1	0	0	0
31	Gastropoda	Patella aspera	N	0	0	1	0	0	0	0	0	1	0	0	0	0
32	Gastropoda	Patella vulgata	N	1	2	7	0	1	0	3	5	2	0	0	0	0
33	Gastropoda	Patella depressa	N	0	1	2	2	0	0	4	3	2	2	0	0	0
34	Gastropoda	Patella ulyssiponensis	N	0	0	0	3	0	1	0	3	0	0	0	0	0
35	Gastropoda	Phorcus lineatus	N	0	2	1	0	0	0	1	2	0	2	0	0	0
36	Gastropoda	Phorcus sauciatus	N	0	0	0	0	0	0	1	0	0	1	0	0	0
37	Gymnolaemata	Bugula neritina+	IAS	0	1	0	0	0	1	0	0	0	0	0	0	0
38	Gymnolaemata	Crassimarginatella papulifera+	NIS	1	0	0	0	0	0	0	0	0	0	0	0	0
39	Gymnolaemata	Watersipora subtorquata+	IAS	1	1	1	0	0	1	1	2	3	3	0	0	0
40	Hexanauplia	Balanidae sp.	-	0	1	0	1	2	0	3	1	1	0	0	0	0
41	Hexanauplia	Balanus trigonus	N	0	0	0	0	0	0	1	1	0	0	6	0	0
42	Hexanauplia	Chthamalus stellatus	N	0	2	4	5	3	0	9	6	7	6	0	0	0
43	Hexanauplia	Chthamalus montagui	N	0	2	4	2	0	0	5	8	5	0	0	0	0
44	Hexanauplia	Perforatus perforatus	N	2	7	0	2	4	0	5	8	6	4	0	26	0
45	Hoplonemertea	Emplectonema gracile	N	0	0	0	0	1	0	0	0	0	0	0	0	0
46	Hoplonemertea	Nemertopsis bivittata	N	0	1	0	0	0	0	0	0	0	0	0	0	0
47	Malacostraca	Athanas nitescens	N	1	0	0	0	0	0	0	0	0	0	0	0	0
48	Malacostraca	Carcinus maenas	N	0	0	0	1	0	0	0	0	0	0	0	0	0
49	Malacostraca	Clibanarius erythropus	N	0	0	0	0	0	0	0	0	0	0	0	0	0
50	Malacostraca	Monocorophium acherusicum*	C	0	0	0	0	0	0	0	0	0	0	0	3	0
51	Malacostraca	Pachygrapsus marmoratus	N	1	0	0	0	1	0	1	0	3	1	0	0	0
52	Malacostraca	Palaemon serratus	N	0	1	0	0	0	0	0	0	0	0	0	0	0
53	Malacostraca	Pilumnus hirtellus	N	0	1	0	0	0	1	0	0	0	0	0	4	0
54	Malacostraca	Pinnotheres pisum	N	0	0	0	0	0	0	0	0	1	0	0	0	0
55	Malacostraca	Porcellana platycheles	N	0	1	1	0	0	0	3	2	0	0	0	0	0
56	Ophiuroidea	Ophiothrix sp	N	1	0	0	0	0	2	0	0	0	0	0	0	0
57	Phascolosomatidea	Phascolosoma granulatum	N	0	0	0	0	0	0	0	0	1	0	0	0	0
58	Pilidiophora	Riseriellus occultus	N	0	0	1	0	0	0	0	0	0	0	0	0	0
59	Polychaeta	Aphelochaeta marioni	N	0	2	0	0	0	0	0	0	0	0	0	0	0
60	Polychaeta	Cirratulus sp.	-	0	0	0	1	0	0	0	0	0	0	0	0	0
61	Polychaeta	Dipolydora capensis	NIS	0	0	0	0	0	0	0	0	0	1	0	1	0
62	Polychaeta	Eulalia viridis	N	0	1	0	0	0	0	0	0	3	0	0	0	0
63	Polychaeta	Eumida sanguinea	N	1	0	0	0	0	0	0	0	0	0	0	0	0
64	Polychaeta	Lepidonotus clava	N	0	1	0	0	0	0	0	0	0	0	0	0	0
65	Polychaeta	Leodice harassii	N	0	0	0	0	0	0	0	1	0	0	0	0	0
66	Polychaeta	Lysidice ninetta	N	0	0	0	0	0	3	0	0	0	0	0	0	0
67	Polychaeta	Ophryotrocha puerilis*	N	0	0	0	0	0	0	0	0	0	0	1	0	0
68	Polychaeta	Nereiphylla lutea	NIS	0	0	0	0	0	0	0	0	0	1	0	0	0
69	Polychaeta	Nereis pelagica*	N	0	0	0	0	0	0	0	0	0	0	0	2	0
70	Polychaeta	Perinereis cultrifera	N	0	0	0	1	0	0	0	0	0	0	0	0	0
71	Polychaeta	Phyllodoce groenlandica	NIS	0	0	0	0	1	0	0	2	0	0	0	0	0
72	Polychaeta	Platynereis dumerilii	N	1	0	4	3	1	1	0	2	0	0	0	0	0
73	Polychaeta	Pomatoceros triqueter	N	2	0	1	0	0	0	1	0	0	2	1	6	0
74	Polychaeta	Scoletoma funchalensis	N	0	0	0	0	0	1	0	0	0	0	0	0	0
75	Polychaeta	Serpula concharum	N	0	0	0	0	0	2	0	0	0	0	0	0	0
76	Polychaeta	Spirobranchius sp.	-	0	0	0	0	0	0	0	0	0	1	0	4	0
77	Polychaeta	Spirobranchus latiscapus	NIS	0	0	0	0	0	0	1	0	0	1	0	1	0
78	Polychaeta	Spirobranchus lamarcki	N	1	0	0	0	0	0	0	0	0	0	0	0	0
79	Polychaeta	Spirobranchus taeniatus*	NIS	0	0	0	0	0	0	0	0	0	0	0	1	0
80	Polychaeta	Spirobranchus triqueter	N	0	0	0	0	0	0	0	1	0	0	1	4	0
81	Polychaeta	Terebella lapidaria	N	0	0	3	2	0	0	0	0	1	0	0	0	0
82	Polyplacophora	Acanthochitona crinita	N	0	0	1	1	0	0	4	2	2	0	0	0	0
83	Polyplacophora	Lepidochitona cinerea	N	0	0	0	0	0	0	0	0	1	0	0	0	0
		Totals		18	39	64	52	21	21	61	83	56	34	14	59	0
		Grand totals by years + vessels						194					255			163
		Grand total														612

## Sheet: Supplementary table 7
Supplementary table 7. General information of the studied vessels from the port of Gijon, Spain. (TG): Time docked in Gijon; (TFP): time since antifouling painting; (n): number of species.
Ship	Flag	Origin	Destiny	Length (m)	TG (days)	TFP (months)	n	Species	NIS	Activity
1	Holland	Rusia	UK	145	1	3	0	0	0	Transport
2	Spain	Spain	Spain	43	13	36	59	12	4	Dredging
3	Spain	Spain	Spain	32	96	Unknown	14	6	1	Inactive

## Sheet: References
Allen F. E. (1953). Distribution of marine invertebrates by ships. Australian Journal of Marine and Freshwater Research, 4, 307–316. https://doi.org/10.1071/MF9530307
Altuna, Á., & Ibérica, P. F. (2015). Cnidarios (Cnidaria) bentónicos del Golfo de Vizcaya y zonas próximas (Atlántico NE). Lista de especies, batimetría y anotaciones.
Altuna, Á., & Ibérica, P. F. (2010). Listado de los cnidarios (Cnidaria) bentónicos del Golfo de Vizcaya y zonas próximas (Atlántico NE). Proyecto Fauna Ibérica. Museo Nacional de Ciencias Naturales, Madrid.
Apte, S., Holland, B. S., Godwin, L. S., & Gardner, J. P. (2000). Jumping ship: a stepping stone event mediating transfer of a non-indigenous species via a potentially unsuitable environment. Biological Invasions, 2(1), 75-79.
Aravena, G., Villate, F., Uriarte, I., Iriarte, A., & Ibanez, B. (2009). Response of Acartia populations to environmental variability and effects of invasive congenerics in the estuary of Bilbao, Bay of Biscay. Estuarine, Coastal and Shelf Science, 83(4), 621-628.
Arias A., Bañon R., Almon B., Anadon N., Borrell Y. J., Cremades J., Esquete A., Fernández-Alvarez F. A., Garcia-Vazquez E., Parapar J., Rico J., Salas C., San Martín G., Torralba-Burrial A., Trigo J. (2014) Non-indigenous marine species (NIS) in the Cantabrian sea and adjacent Atlantic (NW-N Iberian peninsula): a first approach for the Marine Strategy Framework Directive in northern Spain waters…
Bachelet, G., Blanchet, H., Cottet, M., Dang, C., de Montaudouin, X., de Moura Queirós, A., ... & Lavesque, N. (2009). A round-the-world tour almost completed: first records of the invasive mussel Musculista senhousia in the north-east Atlantic (southern Bay of Biscay). Marine Biodiversity Records, 2(1).
Benech, S. V. (1978). Ocean transport of a community of the grapsid crab Plagusia dentipes (de Haan, 1833). Crustaceana, 35(1), 104-104.
Benito, I., & Onaindia, M. (1991). Biomass and aboveground production of four angiosperms in Cantabrian (N. Spain) salt marshes. Vegetatio, 96(2), 165-175.
BOE (2013). Real Decreto 630/2013, de 2 de agosto, por el que se regula el Catálogo español de especies exóticas invasoras. Boletín Oficial del Estado, 185, 56764-56786. BOE-A-2013-8565. Updated in 2018 (BOE-A-2018-10240) and in 2019 (BOE-A-2019-4675).
Borja, A., & Muxika, I. (2001). Actualización del catálogo de los moluscos marinos de la costa vasca, en campañas realizadas por AZTI. Iberus, 19(2), 67-85.
Borrell, Y. J., Miralles, L., Do Huu, H., Mohammed-Geba, K., & Garcia-Vazquez, E. (2017). DNA in a bottle—Rapid metabarcoding survey for early alerts of invasive species in ports. PloS one, 12(9), e0183347.
Bortolus, A., Carlton, J. T., & Schwindt, E. (2015). Reimagining South American coasts: unveiling the hidden invasion history of an iconic ecological engineer. Diversity and Distributions, 21(11), 1267-1283.
Briski E., Bailey S. A., MacIsaac H. J. (2011). Invertebrates and their dormant eggs transported in ballast sediments of ships arriving to the Canadian coasts and the Laurentian Great Lakes. Limnology and Oceanography, 56(5), 1929-1939.
Cabrini, M., Cerino, F., de Olazabal, A., Di Poi, E., Fabbro, C., Fornasaro, D., ... & Hure, M. (2019). Potential transfer of aquatic organisms via ballast water with a particular focus on harmful and non-indigenous species: A survey from Adriatic ports. Marine pollution bulletin, 147, 16-35.
Carlton, J. T., & Hodder, J. (1995). Biogeography and dispersal of coastal marine organisms: experimental studies on a replica of a 16th-century sailing vessel. Marine Biology, 121(4), 721-730.
Carlton, J. T., & Ruiz, G. M. (2005). The magnitude and consequences of bioinvasions in marine ecosystems. Marine conservation biology. Island Press, Washington DC, 123-148.
Carlton, J. T. (1999). Molluscan invasions in marine and estuarine communities. Malacologia, 41(2), 439-454.
Carlton, J. T. (2009). Deep invasion ecology and the assembly of communities in historical time. In Biological invasions in marine ecosystems (pp. 13-56). Springer, Berlin, Heidelberg.
Catta, J.D., 1876. Note sur quelques crustacés erratiques. Annales des Sciences Naturelles Zoologie, 3, 1–33
Cervera, J. L., Calado, G., Gavaia, C., Malaquias, M. A., Templado, J., Ballesteros, M. B. V., ... & Megina, C. (2004). An annotated and updated checklist of the ophsthobranchs ((Mollusca: Gastropoda) from Spain and Portugal (including islands and archipelagos). Boletín del Instituto Español de Oceanografía, 2004, vol. 20, num. 1-4, p. 1-122.
Chan, F. T., MacIsaac, H. J., & Bailey, S. A. (2015). Relative importance of vessel hull fouling and ballast water as transport vectors of nonindigenous species to the Canadian Arctic. Canadian Journal of Fisheries and Aquatic Sciences, 72(8), 1230-1242.
Chan, F. T., MacIsaac, H. J., & Bailey, S. A. (2016). Survival of ship biofouling assemblages during and after voyages to the Canadian Arctic. Marine biology, 163(12), 250.
Chapman, J. W., Carlton, J. T., Bellinger, M. R., & Blakeslee, A. M. (2007). Premature refutation of a human-mediated marine species introduction: the case history of the marine snail Littorina littorea in the Northwestern Atlantic. Biological Invasions, 9(6), 737-750.
Cheniti, R., Rochon, A., & Frihi, H. (2018). Ship traffic and the introduction of diatoms and dinoflagellates via ballast water in the port of Annaba, Algeria. Journal of Sea Research, 133, 154-165.
Clarke Murray C., Pakhomov E. A., Therriault T. W. (2011). Recreational boating: a large unregulated vector transporting marine invasive species. Diversity & Distributions, 17(6), 1161–1172. https://doi.org/10.1111/j.1472-4642.2011.00798.x
Cross, M. E., Bradley, C. R., Cross, T. F., Culloty, S., Lynch, S., McGinnity, P., ... & Prodöhl, P. A. (2016). Genetic evidence supports recolonisation by Mya arenaria of western Europe from North America. Marine Ecology Progress Series, 549, 99-112.
Currie, D. R., McArthur, M. A., & Cohen, B. F. (2000). Reproduction and distribution of the invasive European fanworm Sabella spallanzanii (Polychaeta: Sabellidae) in Port Phillip Bay, Victoria, Australia. Marine Biology, 136(4), 645-656.
Darling, J. A., Martinson, J., Gong, Y., Okum, S., Pilgrim, E., Lohan, K. M. P., ... & Ruiz, G. M. (2018). Ballast water exchange and invasion risk posed by intracoastal vessel traffic: an evaluation using high throughput sequencing. Environmental science & technology, 52(17), 9926-9936.
Edgell T. C., Hollander J. (2011). The Evolutionary Ecology of European Green Crab, Carcinus maenas, in North America. In In the Wrong Place-Alien Marine Crustaceans: Distribution, Biology and Impacts (pp. 641-659). Springer, Dordrecht.
Eldredge, L. G., & Smith, C. M. (Eds.). (2001). A guidebook of introduced marine species in Hawaii. Honolulu, HI: Bishop Museum and the University of Hawai'i.
Farrapeira, C. M. R., Melo, A. V. D. O. M. D., Barbosa, D. F., & Silva, K. M. E. D. (2007). Ship hull fouling in the Port of Recife, Pernambuco. Brazilian Journal of Oceanography, 55(3), 207-221.
Ferreira, C. E. L., Gonçalves, J. E. A., & Coutinho, R. (2006). Ship hulls and oil platforms as potential vectors to marine species introduction. Journal of Coastal Research, 1340-1345.
Flagella, M. M., Verlaque, M., Soria, A., & Buia, M. C. (2007). Macroalgal survival in ballast water tanks. Marine pollution bulletin, 54(9), 1395-1401.
Foster, B. A., & Willan, R. C. (1979). Foreign barnacles transported to New Zealand on an oil platform. New Zealand Journal of Marine and Freshwater Research, 13(1), 143-149.
Frey, M. A., Simard, N., Robichaud, D. D., Martin, J. L., & Therriault, T. W. (2014). Fouling around: vessel sea-chests as a vector for the introduction and spread of aquatic invasive species. Management of Biological Invasions, 5(1), 21.
Geller, J., Sotka, E. E., Kado, R., Palumbi, S. R., & Schwindt, E. (2008). Sources of invasions of a northeastern Pacific acorn barnacle, Balanus glandula, in Japan and Argentina. Marine Ecology Progress Series, 358, 211-218.
Godwin, L. S. (2003). Hull fouling of maritime vessels as a pathway for marine species invasions to the Hawaiian Islands. Biofouling, 19(S1), 123-131.
Gollasch, S. (2002). The importance of ship hull fouling as a vector of species introductions into the North Sea.
Gouillieux, B. (2017). New records of benthic amphipods, Jassa slatteryi Conlan, 1990 and Ampithoe valida Smith, 1873 (Crustacea: Peracarida: Amphipoda) for the Bay of Biscay, France, with morphological notes. Cahiers Bioliologie Marine, 58, 279-289.
Gouillieux, B. (2019). Monocorophium acherusicum (Amphipoda, Corophiidae), a species commensal to Diogenidae in Arcachon Bay, Bay of Biscay. Crustaceana, 92(1), 129-135.
Goulletquer, P., Bachelet, G., Sauriau, P. G., & Noel, P. (2002). Open Atlantic coast of Europe—a century of introduced species into French waters. In Invasive aquatic species of Europe. Distribution, impacts and management (pp. 276-290). Springer, Dordrecht.
Hallegraeff, G. M., & Bolch, C. J. (1992). Transport of diatom and dinoflagellate resting spores in ships' ballast water: implications for plankton biogeography and aquaculture. Journal of plankton research, 14(8), 1067-1084.
Hay, C. H. (1990). The dispersal of sporophytes of Undaria pinnatifida by coastal shipping in New Zealand, and implications for further dispersal of Undaria in France. British phycological journal, 25(4), 301-313.
Hayward, B. W. (1997). Introduced marine organisms in New Zealand and their impact in the Waitemata Harbour, Auckland. Tane, 36, 197-223.
Herborg, L. M., O’Hara, P., & Therriault, T. W. (2009). Forecasting the potential distribution of the invasive tunicate Didemnum vexillum. Journal of Applied Ecology, 46(1), 64-72.
Holm, E., & Hamilton, J. G. (1988). Range extension for the fourspine stickleback, Apeltes quadracus, to Thunder Bay, Lake Superior. Canadian field-naturalist. Ottawa ON, 102(4), 653-656.
Ibabe, A., Miralles, L., Carleos, C.E., Soto-López, V., Menéndez-Teleña, D., Bartolomé, M., Montes, H.J., González M., Garcia-Vazquez, E. & Borrell, Y.J. (2020b). Environmental evaluations in industrial ports using eDNA biota indices including species invasiveness: a new Blue-gAMBI index at the Port of Gijon, Bay of Biscay. Marine Pollution Bulletin (submitted).
Kooistra, W. H., & Verbruggen, H. (2005). Genetic patterns in the calcified tropical seaweed Halimeda opuntia, H. distorta, H. hederacea, and H. minima (Bryopsiales, chlorophyta) provide insights in species boundaries and interoceanic dispersal. Journal of Phycology, 41(1), 177-187.
Lewis, P. N., Riddle, M. J., & Hewitt, C. L. (2004). Management of exogenous threats to Antarctica and the sub-Antarctic Islands: balancing risks from TBT and non-indigenous marine organisms. Marine pollution bulletin, 49(11-12), 999-1005.
Lim C. S., Leong Y. L., Tan K. S. (2017). Managing the risk of non-indigenous marine species transfer in Singapore using a study of vessel movement. Marine pollution bulletin, 115(1-2), 332-344.
Ma, K. C., Hawk, H. L., Goodwin, C., & Simard, N. (2019). Morphological identification of two invading ascidians: new records of Ascidiella aspersa (Müller, 1776) from Nova Scotia and Diplosoma listerianum (Milne-Edwards, 1841) from New Brunswick and Quebec. BioInvasions Record, 8(1).
MacIsaac, H. J., Grigorovich, I. A., Hoyle, J. A., Yan, N. D., & Panov, V. E. (1999). Invasion of Lake Ontario by the Ponto–Caspian predatory cladoceran Cercopagis pengoi. Canadian Journal of Fisheries and Aquatic Sciences, 56(1), 1-5.
Martínez, J., & Adarraga, I. (2011). Distribución batimétrica de comunidades macrobentónicas de sustrato blando en la plataforma continental de Guipúzcoa (golfo de Vizcaya). Boletín. Instituto Español de Oceanografía, 17(1 y 2), 33-48.
Martinez-Laiz, G., Ros, M., & Guerra-Garcia, J. M. (2018). Marine exotic isopods from the Iberian Peninsula and nearby waters. PeerJ, 6, e4408.
May, B., & Marsden, J. E. (1992). Genetic identification and implications of another invasive species of dreissenid mussel in the Great Lakes. Canadian Journal of Fisheries and Aquatic Sciences, 49(7), 1501-1506.
Mills, E. L., Leach, J. H., Carlton, J. T., & Secor, C. L. (1993). Exotic species in the Great Lakes: a history of biotic crises and anthropogenic introductions. Journal of Great Lakes Research, 19(1), 1-54.
Mineur, F., Johnson, M. P., Maggs, C. A., & Stegenga, H. (2007). Hull fouling on commercial ships as a vector of macroalgal introduction. Marine biology, 151(4), 1299-1307.
Nydam, M. L., Giesbrecht, K. B., & Stephenson, E. E. (2017). Origin and dispersal history of two colonial ascidian clades in the Botryllus schlosseri species complex. PloS one, 12(1), e0169944.
Occhipinti-Ambrogi, A., Marchini, A., Cantone, G., Castelli, A., Chimenz, C., Cormaci, M., ... & Giangrande, A. (2011). Alien species along the Italian coasts: an overview. Biological invasions, 13(1), 215-237.
Olenin, S., Gollasch, S., Jonušas, S., & Rimkutė, I. (2000). En‐route investigations of plankton in ballast water on a ship's voyage from the Baltic Sea to the open Atlantic coast of Europe. International Review of Hydrobiology: A Journal Covering all Aspects of Limnology and Marine Biology, 85(5‐6), 577-596.
Ortea Rato, J. Á. (1977). Moluscos marinos Gasterópodos y Bivalvos del litoral asturiano entre Ribadesella y Ribadeo con especial atención a la subclase de los Opistobranquios.
Page, H. M., Dugan, J. E., Culver, C. S., & Hoesterey, J. C. (2006). Exotic invertebrate species on offshore oil platforms. Marine Ecology Progress Series, 325, 101-107.
Panov, V. E., Buchenkov, D. E., Berezina, N. A., & Maximov, A. A. (2003, September). Alien species introductions in the eastern Gulf of Finland: current state and possible management options. In Proceedings of the Estonian Academy of Sciences. Biology, Ecology (Vol. 52, No. 3, pp. 254-267).
Panova, M., Blakeslee, A. M., Miller, A. W., Mäkinen, T., Ruiz, G. M., Johannesson, K., & André, C. (2011). Glacial history of the North Atlantic marine snail, Littorina saxatilis, inferred from distribution of mitochondrial DNA lineages. PLoS One, 6(3), e17511.
Pastorino, G., Penchaszadeh, P. E., Schejter, L., & Bremec, C. S. (2000). Rapana venosa (Valenciennes, 1846) (Mollusca: Muricidae): A new gastropod in South Atlantic waters. [Rapana venosa (Valenciennes, 1846)(Mollusca: Muricidae): un nuevo gasterópodo en aguas del Atlántico sudoccidental]. Journal of Shellfish Research, 19(2), 897-899.
Pollard D. A., Hutchings P. A. (1990). A review of exotic marine organisms introduced to the Australian region. 2. Invertebrates and algae. Asian fisheries science. Metro Manila, 3(2), 223-250.
Pronin, N. M., Fleischer, G. W., Baldanova, D. R., & Pronina, S. V. (1997). Parasites of the recently established round goby (Neogobius melanostomus) and tubenose goby (Proterorhinus marmoratus)(Cottidae) from the St. Clair River and Lake St. Clair, Michigan, USA. Folia Parasitologica, 44(1), 1-6.
Reid, J. W., & Hudson, P. L. (2008). Comment on “Rate of species introductions in the Great Lakes via ships’ ballast water and sediments”. Canadian Journal of Fisheries and Aquatic Sciences, 65(3), 549-553.
Reverter-Gil, O., & Fernandez-Pulpeiro, E. (1999). Some records of bryozoans from NW Spain. Cahiers de Biologie Marine, 40(1), 35-46.
Roy, S., Parenteau, M., Casas-Monroy, O., & Rochon, A. (2012). Coastal ship traffic: a significant introduction vector for potentially harmful dinoflagellates in eastern Canada. Canadian journal of fisheries and aquatic sciences, 69(4), 627-644.
Souto, J., Lustres-Pérez, V., & Fernández-Pulpeiro, E. (2008). Nuevos datos sobre la presencia del molusco gasterópodo Stramonita haemastoma (Linnaeus, 1766) en las costas gallegas. Nova Acta Cient Compostel (Biol), 17, 97-104.
Valdés, L., López-Urrutia, A., Cabal, J., Alvarez-Ossorio, M., Bode, A., Miranda, A., ... & Llope, M. (2007). A decade of sampling in the Bay of Biscay: What are the zooplankton time series telling us?. Progress in Oceanography, 74(2-3), 98-114.
Vázquez, E., & Urgorri Carrasco, V. (1992). Ascidiáceos del “fouling” de la ensenada de A Graña, Ría de Ferrol (Galicia, España).
Volovik, S. P., Mirzoyan, I. A., & Volovik, G. S. (1993). Mnemiopsis leidyi: biology, population dynamics, impact to the ecosystem and fisheries. ICES (Biol. Oceanogr. Committee), 69, 1-11.
Witt, J. D., Hebert, P. D., & Morton, W. B. (1997). Echinogammarus ischnus: another crustacean invader in the Laurentian Great Lakes basin. Canadian Journal of Fisheries and Aquatic Sciences, 54(2), 264-268.
Zaranko, D.T., Farara, D.G., and Thompson, F.G. 1997. Another exotic mollusc in the Laurentian Great Lakes: the New Zealand native Potamopyrgus antipodarum (Gray 1843) (Gastropoda, Hydrobiidae). Can. J. Fish. Aquat. Sci. 54: 809ñ814.
Zibrowius, H. (1991). Ongoing modification of the Mediterranean marine fauna and flora by the establishment of exotic species. Mésogée, 51, 83-107.
